# Supplementary material
Source: Research Square preprint supplement (doi:10.21203/rs.3.rs-9793831/v1)
Supplement: Supplementary file 1 [file 53c58d048baee03b9fb9e236.docx]

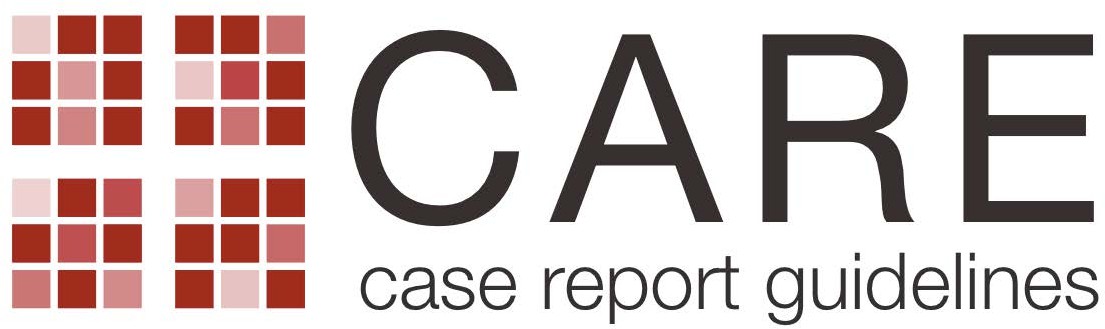
CARE Checklist of information to include when writing a case report
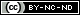


**Topic Item Checklist item description Reported on Line**

**Title 1** The diagnosis or intervention of primary focus followed by the words “case report” . . . . . . . . . . . . . . . . . . Page 1, Line 1

**Key Words 2** 2 to 5 key words that identify diagnoses or interventions in this case report, including "case report" Page 1,Lines 3 - 4

**Abstract**

**(no references)**

**3a** Introduction: What is unique about this case and what does it add to the scientific literature? Page 1, Lines 7–9

**3b** Main symptoms and/or important clinical findings . . . . . . . . . . . . . . . . . . . . . . . . . . . . . . . . . . . . . . . . . . . . . . . . . . . Page 1, Lines 12-17

**3c** The main diagnoses, therapeutic interventions, and outcomes Page 1, 2, Lines 17-22

**3d** Conclusion—What is the main “take-away” lesson(s) from this case? Page 2, Lines 23-31

**Introduction 4** One or two paragraphs summarizing why this case is unique (**may include** reference**s**) Page 2 Lines 33-42

**Patient Information 5a** De-identified patient specific information Page 3 , Lines 44

**5b** Primary concerns and symptoms of the patient Page 3 , Lines 44- 45

**5c** Medical, family, and psycho-social history including relevant genetic information Page 3 , Lines 50-51

**5d** Relevant past interventions with outcomes Page 3 , Lines 46-50

**Clinical Findings**

**Timeline**

**Diagnostic Assessment**

**Therapeutic Intervention**

**Follow-up and Outcomes**

1. Describe significant physical examination (PE) and important clinical findings Page 3,4 ,Lines 52- 64
2. Historical and current information from this episode of care organized as a timeline Page 8, Timeline table

**8a** Diagnostic testing (such as PE, laboratory testing, imaging, surveys). Page 4 , Lines 59-72

**8b** Diagnostic challenges (such as access to testing, financial, or cultural) Page 4 , Lines 72-73

**8c** Diagnosis (including other diagnoses considered) Page 4 , Lines 72-73

**8d** Prognosis (such as staging in oncology) where applicable Page 7, Lines 99-101

**9a** Types of therapeutic intervention (such as pharmacologic, surgical, preventive, self-care) . . . . . . . . . . . . . . . . . Page 5 , Lines 78-86

**9b** Administration of therapeutic intervention (such as dosage, strength, duration) Page 7, Lines 95-98,102-104

**9c** Changes in therapeutic intervention (with rationale) Not applicable

**10a** Clinician and patient-assessed outcomes (if available) Page 7,8,Lines 101-108

**10b** Important follow-up diagnostic and other test results Page7, 8,Lines 105-108

**10c** Intervention adherence and tolerability (How was this assessed?) Page 7,Lines 104-105

**10d** Adverse and unanticipated events Page 7,Lines 104-105

**Discussion 11a** A scientific discussion of the strengths AND limitations associated with this case report Page 10,11,Lines 159-164

**11b** Discussion of the relevant medical literature **with references** Page 10,11,Lines 113-158

**11c** The scientific rationale for any conclusions (including assessment of possible causes Page 10,11,Lines 120-131

**11d** The primary “take-away” lessons of this case report (without references) in a one paragraph conclusion Page12 ,Lines 167-179

**Patient Perspective 12** The patient should share their perspective in one to two paragraphs on the treatment(s) they received Page 9 , in timeline table, follow up

**Informed Consent 13** Did the patient give informed consent? Please provide if requested . . . . . . . . . . . . . . . . . . . . . . . . . . . . . . . . . . . . . . **Obtained
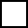
**
